# Supplementary material
Source: PubMed Central journal article supplement (PMC11493136)
Supplement: NIHMS1528442-supplement-Supp1.pdf [file NIHMS1528442-supplement-Supp1.pdf]

# LipidQC: Method Validation Tool for Visual Comparison to SRM 1950 Using NIST Interlaboratory Comparison Exercise Lipid Consensus Mean Estimate Values

Candice Z. Ulmer<sup>†</sup>, Jared M. Ragland<sup>†</sup>, Jeremy P. Koelme<sup>‡</sup>, Alan Heckert<sup>§</sup>, Christina M. Jones<sup>†</sup>, Timothy J. Garrett<sup>||</sup>, Richard A. Yost<sup>‡||</sup>, John A. Bowden<sup>†\*</sup>

<sup>†</sup> National Institute of Standards and Technology, Chemical Sciences Division, Marine Biochemical Sciences Group, Hollings Marine Laboratory, 331 Fort Johnson Road, Charleston, SC 29412 USA

<sup>‡</sup> University of Florida, Department of Chemistry, 125 Buckman Drive, Gainesville, FL 32611, USA

<sup>§</sup> National Institute of Standards and Technology, Statistical Engineering Division, 100 Bureau Drive, Gaithersburg, MD 20899 USA

<sup>||</sup> University of Florida, Department of Pathology, Immunology and Laboratory Medicine, Gainesville, FL 32610 USA

Address reprint requests to

John Bowden, 331 Ft. Johnson Road, Charleston, SC 29412, tel: (843) 725-4820, fax: (843) 762-8742, john.bowden@nist.gov

---

**ABSTRACT:** As advances in analytical separation techniques, mass spectrometry instrumentation, and data processing platforms continue to spur growth in the lipidomics field, more structurally unique lipid species are detected and annotated. The lipidomics community is in need of benchmark reference values to assess the validity of various lipidomics workflows in providing accurate quantitative measurements across the diverse lipidome. LipidQC addresses the harmonization challenge in lipid quantitation by providing a semi-automated process, independent of analytical platform, for visual comparison of experimental results of NIST SRM 1950 Metabolites in Frozen Human Plasma against benchmark consensus mean concentrations derived from the NIST Lipidomics Interlaboratory Comparison Exercise.

---

## Table of Contents for Supporting Information

Figure S-1. Example summary table for experimental results compared against NIST consensus mean values for SRM 1950.

Figure S-2. Example control plot for experimental results compared against NIST consensus mean values for SRM 1950

Table S-1. LipidQC-supported lipid classes and their corresponding abbreviations.

Table S-2. Breakdown of LipidQC lipid species included with NIST consensus mean values

## FIGURES

**Figure S-1:** Example summary table for experimental results compared against SRM 1950 - "Metabolites in Frozen Human Plasma". The mean and standard deviation (measurement) are calculated from the user-generated experimental data and compared to the consensus mean value (nmol/mL). For the consensus value, the consensus mean is highlighted in blue and the corresponding uncertainty is highlighted in green. **[A]** Screen-capture of summary table for the data obtained from Bligh–Dyer lipid extracts analyzed by UHPLC–HRMS (Figure S1-A). **[B]** Screen-capture of summary table for data obtained from modified Bligh–Dyer lipid extracts analyzed by DI-MS/MS (Figure S1-B). Isobaric species within the same lipid class were summed and reported in the NIST Lipidomics Interlaboratory Study as a single consensus mean estimate value. Therefore, the summed isobaric lipid species present in the interlaboratory study (PC P-38:6/36:0) is shown in the table and the note indicates that the user only provided data for PC 36:0 in the input table from Figure S1-B.

**[A]**

| Lipid Species | Measurement*  | Consensus Value** | Units   | No. of labs | Notes |
|---------------|---------------|-------------------|---------|-------------|-------|
| TAG 50:0      | 4.629 ± 0.21  | 3.8 ± 0.83        | nmol/mL | 11          |       |
| TAG 50:4      | 6.044 ± 0.381 | 8.7 ± 2.9         | nmol/mL | 15          |       |
| TAG 52:3      | 114.9 ± 0.984 | 100 ± 29          | nmol/mL | 16          |       |
| LPC 20:4      | 6.483 ± 1.287 | 6.0 ± 0.60        | nmol/mL | 20          |       |
| LPC 22:1      | 0.012 ± 0.001 | 0.013 ± 0.0046    | nmol/mL | 5           |       |
| LPE 22:6      | 0.909 ± 0.02  | 0.52 ± 0.18       | nmol/mL | 12          |       |
| PC 34:0       | 2.646 ± 0.402 | 2.1 ± 0.37        | nmol/mL | 12          |       |
| PC 36:2       | 184 ± 19.51   | 140 ± 25          | nmol/mL | 18          |       |
| PC 38:3       | 28.36 ± 2.395 | 26 ± 5.2          | nmol/mL | 14          |       |
| PE 34:2       | 1.69 ± 0.076  | 2.2 ± 0.26        | nmol/mL | 16          |       |
| PE 38:4       | 5.89 ± 0.503  | 8.1 ± 1.2         | nmol/mL | 16          |       |
| SM d34:0      | 7.721 ± 1.305 | 5.8 ± 1.3         | nmol/mL | 14          |       |
| SM d34:2      | 15.41 ± 2.596 | 16 ± 2.2          | nmol/mL | 17          |       |
| LPC 24:1      | 0.013 ± 0.002 | 0.022 ± 0.0071    | nmol/mL | 3           |       |

**[B]**

| Lipid Species  | Measurement*  | Consensus Value** | Units   | No. of labs | Notes                          |
|----------------|---------------|-------------------|---------|-------------|--------------------------------|
| FFA 16:0       | 180.2 ± 10.08 | 43 ± 13           | nmol/mL | 5           |                                |
| FFA 20:4       | 4.594 ± 0.75  | 4.7 ± 1.5         | nmol/mL | 7           |                                |
| FFA 20:5       | 3.238 ± 0.059 | 0.42 ± 0.056      | nmol/mL | 7           |                                |
| DAG 36:2       | 5.234 ± 0.267 | 6.2 ± 2.2         | nmol/mL | 16          |                                |
| DAG 36:3       | 6.815 ± 1.283 | 8.4 ± 3.3         | nmol/mL | 15          |                                |
| DAG 36:4       | 0.276 ± 0.046 | 2.8 ± 1.0         | nmol/mL | 12          |                                |
| TAG 50:0       | 29.03 ± 0.745 | 3.8 ± 0.83        | nmol/mL | 11          |                                |
| TAG 56:7       | 6.207 ± 0.163 | 13 ± 2.7          | nmol/mL | 8           |                                |
| LPE 16:0       | 0.753 ± 0.027 | 0.91 ± 0.27       | nmol/mL | 14          |                                |
| PC P-38:6/36:0 | 2.144 ± 0.057 | 1.2 ± 0.39        | nmol/mL | 10          | Includes only PC 36:0 results. |
| CER d34:1      | 0.441 ± 0.075 | 0.28 ± 0.044      | nmol/mL | 17          |                                |
| CER d36:1      | 0.139 ± 0.015 | 0.12 ± 0.021      | nmol/mL | 14          |                                |
| SM d38:1       | 23.03 ± 0.281 | 11 ± 3.1          | nmol/mL | 17          |                                |
| SM d40:2       | 33.58 ± 0.633 | 12 ± 2.8          | nmol/mL | 15          |                                |

\* Measurement mean ± 1 standard deviation.

\*\* Consensus mean ± standard uncertainty.

**Figure S-2:** Example control plot for SRM 1950 - "Metabolites in Frozen Human Plasma". Values are presented as normalized coverage equivalents at the mean (point) and standard deviation (error bars) of measurements, overlaid onto the consensus mean value (blue dotted line). The 95% expanded uncertainty region (green) and 99% expanded uncertainty region (red) for the NIST-ILCE consensus mean estimate value are also displayed. **[A]** Annotated control plot for the data obtained from Bligh–Dyer lipid extracts analyzed by UHPLC-HRMS (Figure S1-A and S2-A). **[B]** Control plot for data obtained from modified Bligh–Dyer lipid extracts analyzed by DI-MS/MS (Figure S1-B and S2-B).

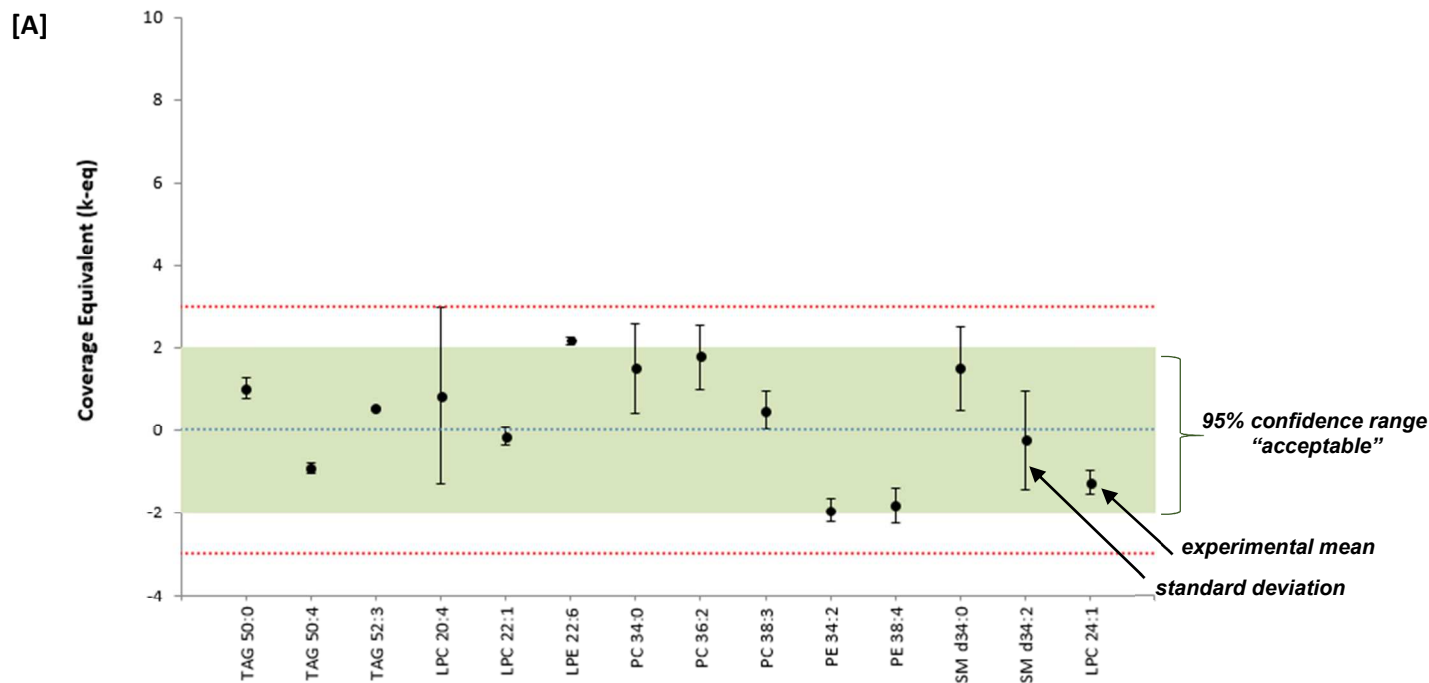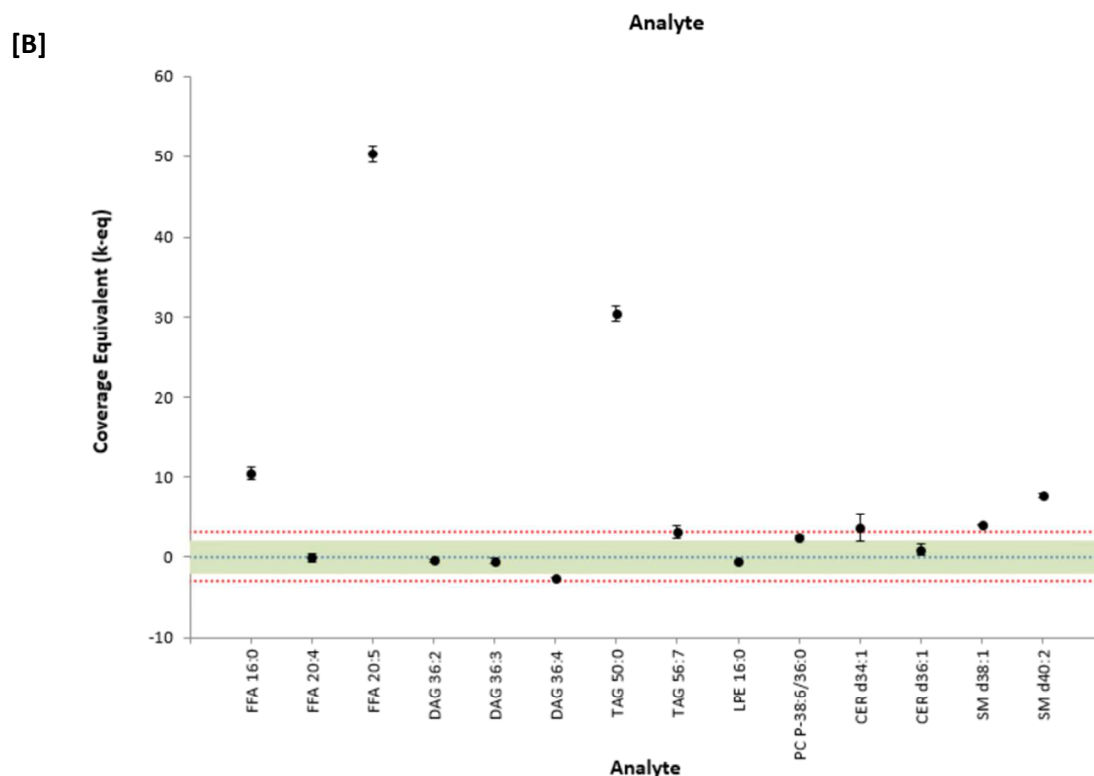

## TABLES

**Table S-1.** LipidQC–supported lipid classes and their corresponding abbreviations. The (\*) denotes lipid classes with plasmanyl and plasmenyl lipid species for which consensus mean values are provided. Consensus mean values are provided for the plasmanyl and plasmenyl lipid species from the LPC, PC, and PE lipid cases for all materials. LipidQC supports the sum composition (PC 36:0), fatty acid position level annotation “/” (PC 16:0/18:1), and the fatty acid level annotation “\_” when the fatty acyl position is unknown (PC 16:0\_18:1).

| Category                  | Lipid Class                              | Abbreviation      | Annotation Style    |
|---------------------------|------------------------------------------|-------------------|---------------------|
| Fatty acyls (FA)          | free fatty acids                         | FFA               | FFA 16:0            |
|                           | eicosanoids                              |                   | 12-HETE             |
| Glycerolipids (GL)        | diacylglycerol                           | DAG               | DAG(16:0_18:1)      |
|                           | triacylglycerol                          | TAG               | TAG(16:0_16:0_18:1) |
| Glycerophospholipids (GP) | lysophosphatidylcholine                  | LPC*              | LPC 16:0            |
|                           | phosphatidylcholine                      | PC*               | PC(16:0_18:1)       |
|                           | lysophosphatidylethanolamine             | LPE               | LPE 16:0            |
|                           | phosphatidylethanolamine                 | PE*               | PE(16:0_18:1)       |
|                           | phosphatidylglycerol                     | PG                | PG(16:0_18:1)       |
|                           | phosphatidylinositol                     | PI                | PI(16:0_18:1)       |
|                           | phosphatidylserine                       | PS                | PS(16:0_18:1)       |
|                           | Sphingolipids (SP)                       | ceramide          | CER                 |
| dihydroceramide           |                                          | CerOH             | CerOH d16:0         |
| hexosylceramide           |                                          | HexCer            | HexCer(d18:1_18:1)  |
| lactosylceramide          |                                          | LacCer            | LacCer(d18:1_18:1)  |
| sphingomyelin             |                                          | SM                | SM(d18:1_18:1)      |
| sphingosine-1-phosphate   |                                          | S1P               | S1P                 |
| sphinganine-1-phosphate   |                                          | dhS1P             | dhSIP               |
| Sterol lipids (ST)        |                                          | cholesteryl ester | CE                  |
|                           | free cholesterol/cholesterol derivatives | FC/CHOL           | Cholesterol         |
|                           | bile acids and derivatives               | BA                | GCDCA               |

**Table S-2.** Number of LipidQC lipid species included for consensus mean values (1) reported by 5 or more laboratories with COD  $\leq$  40 % or (2) reported by 3 or 4 laboratories with COD  $\leq$  40 %. The following NIST materials are included in LipidQC: SRM 1950 (Metabolites in Frozen Plasma)

| Lipid Class  | SRM 1950          |                   |
|--------------|-------------------|-------------------|
|              | <i>n</i> $\geq$ 5 | <i>n</i> = 3 or 4 |
| FFA          | 5                 | 3                 |
| Eicosanoids  | 3                 | 20                |
| DAG          | 5                 | 1                 |
| TAG          | 42                | 7                 |
| LPC          | 25                | 4                 |
| PC           | 53                | 4                 |
| LPE          | 6                 | -                 |
| PE           | 29                | 2                 |
| PG           | 1                 | 2                 |
| PI           | 13                | -                 |
| PS           | -                 | 2                 |
| CER          | 8                 | 4                 |
| CerOH        | -                 | 4                 |
| HexCer       | 4                 | 1                 |
| LacCer       | -                 | -                 |
| SM           | 30                | 2                 |
| S1P          | -                 | 1                 |
| dhS1P        | -                 | 1                 |
| CE           | 15                | 3                 |
| FC/CHOL      | 1                 | 1                 |
| BA           | 14                | 2                 |
| <b>Total</b> | <b>254</b>        | <b>62</b>         |
